# Supplementary material
Source: publisher figshare collection journal article supplement (https://acs.figshare.com/ndownloader/files/5694285)
Supplement: Supplementary file 1 [file 5694285]

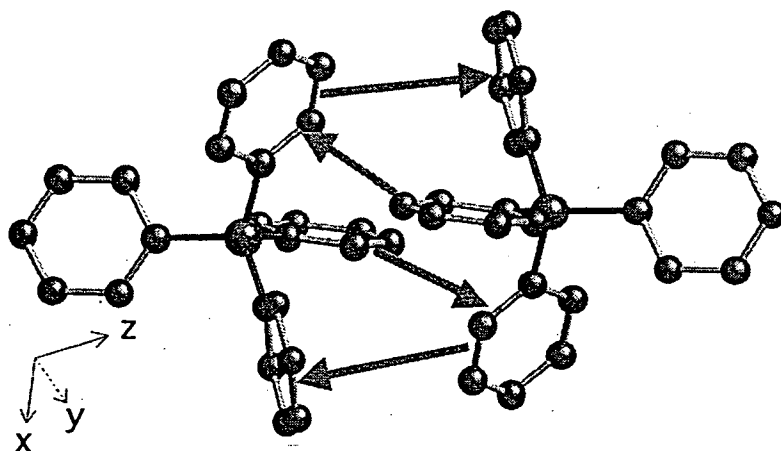

**Figure S1.** A view of a pair of  $\text{PPh}_4^+$  cations in the structure of **1** showing the edge to face interaction between the phenyl rings.

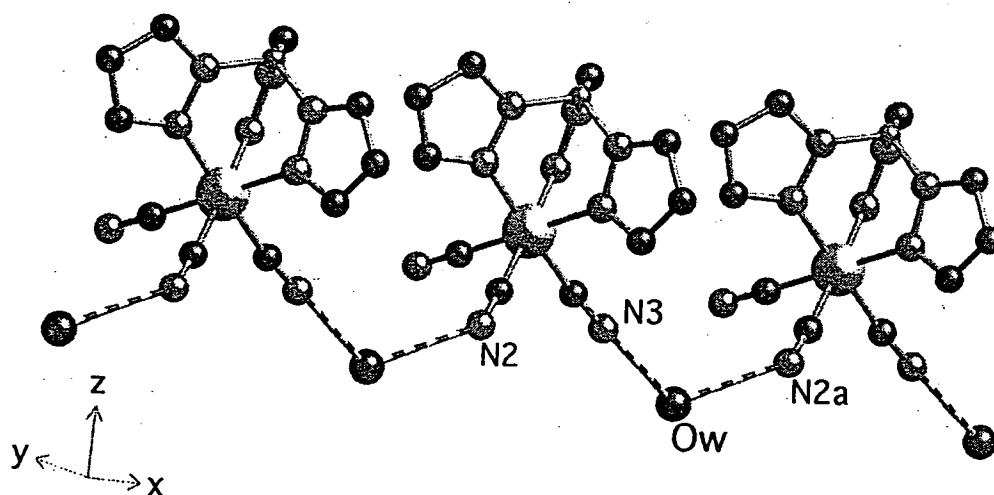

**Figure S2.** Hydrogen bonds linking the half-sandwich  $\text{fac-}[\text{Fe}^{\text{III}}[\text{HB}(\text{pz})_3](\text{CN})_3]^-$  anions in complex **1**.
